# Supplementary material
Source: Springer Nature journal article supplement (https://www.springermedizin.de/resource/supplementary/13024_2012_359_MOESM4_ESM.pdf/9643808)

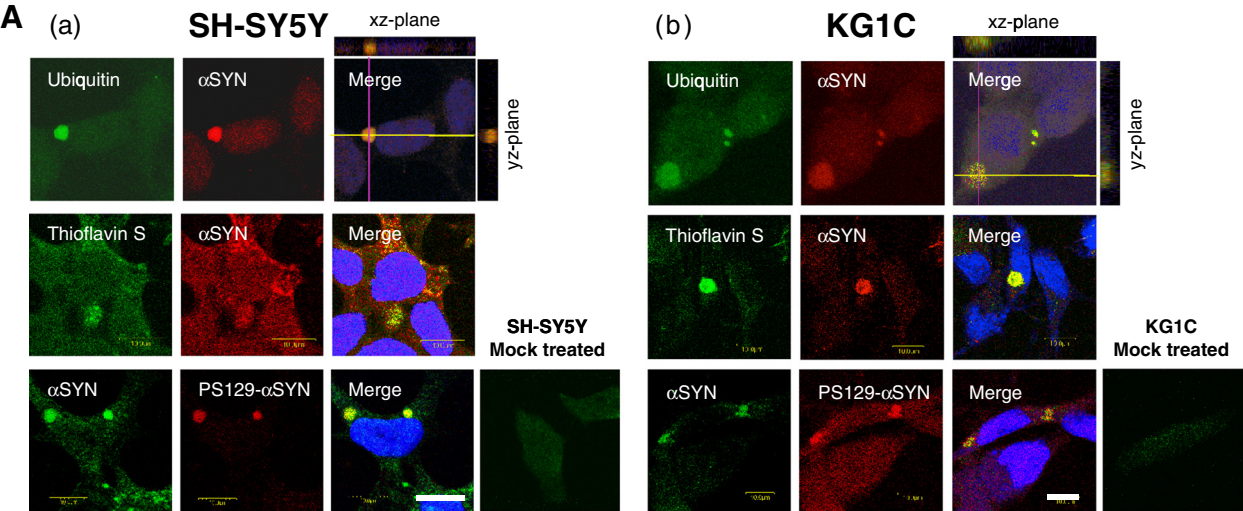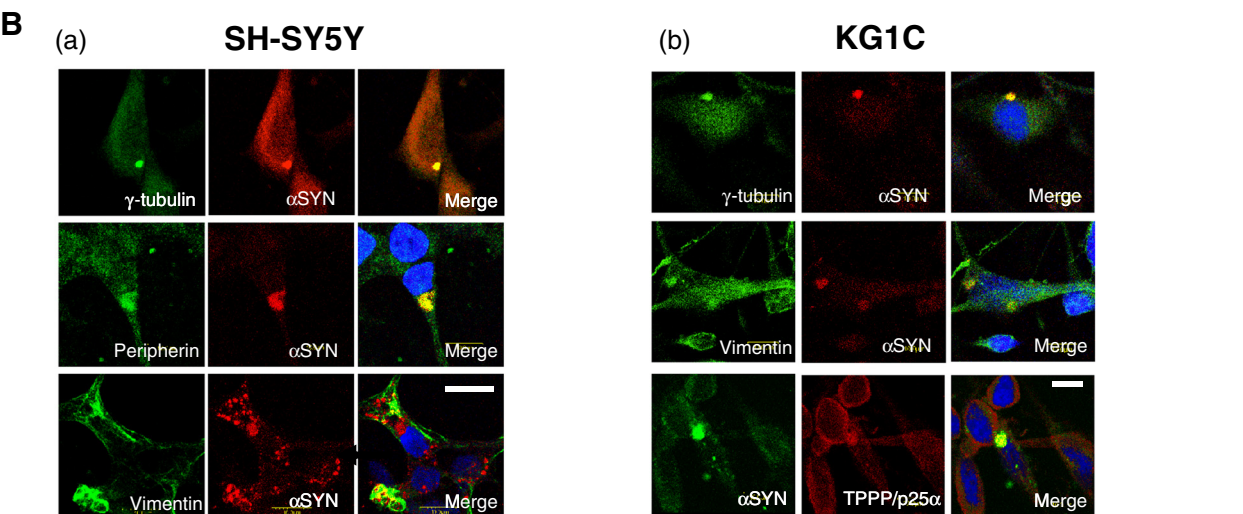

**C** **Primary rat cortical neuron**

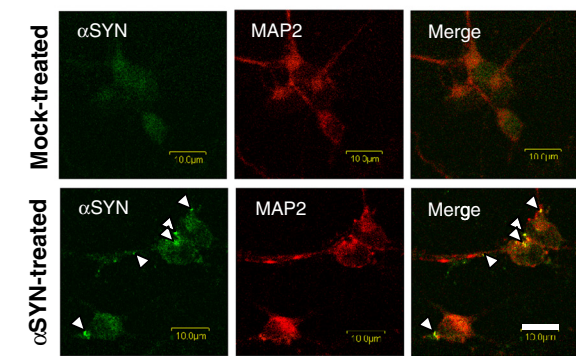

**D**

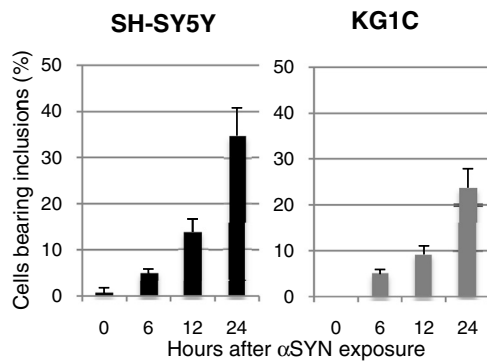

Supplement: MOESM4 [file 9643808]
